# Supplementary material
Source: publisher figshare collection journal article supplement (https://gsapubs.figshare.com/ndownloader/files/27561434)
Supplement: Supplementary file 1 [file 27561434]

## Sheet: Sheet1
Dip	Dip error	Dip error (percent)	Dip direction	Dip dir. error	# measrmnt. points	RMS Error	R^2 (planar fit)	R (Correl. coeff.)	Max_Deviation	Stnd. Err. Of Estimate	Fold train	Avg Dip	Avg Dip err	Max shortening (%)	Min shortening (%)	Avg shortening (%)	Notes
2.7	2.24	82.963	314.24	48.52	8	3.21	0.9326	0.9657	5.59	4.45	Center	4.13	2.4275	-0.654225	-0.0441435	-0.259679
2.9	1.12	38.6207	127.08	17.53	6	0.6	0.9911	0.9956	1.4	1.17	Center
4.08	2.47	60.5392	136.41	35.62	5	0.62	0.992	0.996	1.02	1.12	Center
6.84	3.88	56.7251	285.76	28.42	26	3.46	0.9721	0.9859	8.84	4.48	Center						REMEASURED FOR RESUBMISSION
8.47	1.58	18.6541	93.84	3.39	14	2.19	0.9605	0.9801	6.39	3.08	North	23.4933	8.95111	-15.6088	-3.20371	-8.28935
13.69	7.02	51.2783	70.67	16.21	12	6.1	0.6779	0.8234	14.66	8.34	North
14.59	6.28	43.0432	107.81	21.43	10	3.59	0.9867	0.9933	10.59	5.58	North
15.09	6.43	42.611	310.39	22.14	11	5.14	0.9826	0.9912	10.92	6.94	North
18.51	10.06	54.349	328.16	43.15	9	5.93	0.9718	0.9858	15.99	9.76	North
19.62	5.9	30.0714	96.87	4.6	7	2.53	0.9715	0.9857	5.23	4.06	North
32.39	7.51	23.1862	140.04	15.38	12	1.7	0.986	0.993	3.16	2.34	North						REMEASURED FOR RESUBMISSION
41.18	14.63	35.527	119.73	27	10	7.34	0.9808	0.9903	18.75	11.5	North
47.9	21.15	44.1545	140.21	38.05	7	4.94	0.9902	0.9951	9.06	7.94	North
4.19	1.14	27.2076	284.38	17.29	15	1.1	0.976	0.9879	2.72	1.55	South	12.022	5.25	-4.5094	-0.697675	-2.19323	REMEASURED FOR RESUBMISSION
5.84	2.18	37.3288	281.45	14.97	17	3.49	0.9271	0.9628	8.14	4.49	South						NEW MEASUREMENT FOR RESUBMISSION
11.65	2.56	21.9742	318.8	12.56	13	2.44	0.8723	0.934	6.01	3.34	South						REMEASURED FOR RESUBMISSION
17.28	3.95	22.8588	133.45	13.46	9	2.12	0.996	0.998	5.62	3.3	South
21.15	16.42	77.6359	143.54	49.87	9	5.25	0.9449	0.9721	9.84	7.13	South
1.13	2.41	213.274	297.33	90.68	7	4.19	0.2289	0.4784	6.58	6.2							DISCARDED (Dip error > 90%)
1.39	0.67	48.2014	159.4	14.61	26	3.11	0.39	0.6245	8.14	4				Average
1.77	0.47	26.5537	124.73	13.45	10	0.86	0.8831	0.9398	1.63	1.24				-6.92414	-1.31518	-3.58075
1.79	3.31	184.916	57.28	75.57	10	2.91	0.4979	0.7057	7.98	4.66							DISCARDED (Dip error > 90%)
2.43	0.81	33.3333	121.61	28.79	14	1.44	0.9799	0.9899	2.93	1.98
2.52	0.91	36.1111	136.02	20.93	16	1.67	0.819	0.905	3.9	2.16
2.74	1.48	54.0146	11.39	19.73	16	1.74	0.948	0.9736	5.14	2.59
3.41	8.82	258.651	70.97	63.92	8	3.2	0.3228	0.5681	5.37	4.45							DISCARDED (Dip error > 90%)
3.64	1.54	42.3077	286.23	14.07	9	1.31	0.8756	0.9357	2.11	1.82
3.84	1	26.0417	355.55	6.33	11	1.47	0.9853	0.9926	3.78	2.1
4.03	1.54	38.2134	261.39	5.57	17	3.25	0.8025	0.8958	6.4	4
4.35	1.09	25.0575	103.74	11.73	11	1.89	0.9674	0.9836	3.97	2.62
4.91	2.16	43.9919	124.68	28.17	12	2.22	0.9639	0.9818	3.77	2.87
5.75	2.04	35.4783	116.25	10.5	16	6.29	0.9577	0.9786	14.85	8.5
5.92	1.22	20.6081	195.85	4.53	9	1.22	0.9621	0.9809	4.05	2.05
6.1	2.18	35.7377	59.84	12.31	8	1.2	0.9903	0.9952	1.99	1.59
6.12	2.28	37.2549	82.18	5.45	14	4.9	0.7584	0.8709	10.93	6.02
6.64	5.86	88.253	99.45	10.9	8	4.84	0.7192	0.8481	7.25	6.88
6.87	3.21	46.7249	117.77	14.93	17	7.88	0.928	0.9633	22.53	10.57
7.02	2.11	30.057	31.12	12.09	9	2.25	0.9422	0.9707	4.95	3.34
7.11	0.98	13.7834	21.73	3.36	13	0.73	0.9946	0.9973	1.84	1.06
7.57	10.97	144.914	288.31	63.02	8	5.79	0.9315	0.9651	13.59	9.12							DISCARDED (Dip error > 90%)
8.1	1.05	12.963	311.81	7.34	15	3.64	0.9299	0.9643	8.83	5.01
8.94	2.24	25.0559	358.65	15.98	27	14.36	0.97	0.9849	34.72	17.8
9.21	4.77	51.7915	131.05	26.74	9	2.3	0.9883	0.9941	4.27	3.23
9.33	10.2	109.325	14.92	17.58	10	2.65	0.949	0.9742	4.73	3.48							DISCARDED (Dip error > 90%)
10.56	3.49	33.0492	98.95	6.66	16	3.87	0.8714	0.9335	11.9	5.57
11.65	1.5	12.8755	75.26	3.69	15	3.57	0.9612	0.9804	9.86	5.01
12.68	8.57	67.5868	290.17	19.7	12	6.29	0.571	0.7556	16.25	9.63
13.94	12.69	91.033	343.72	19.19	9	1.88	0.9192	0.9587	5.91	3.18							DISCARDED (Dip error > 90%)
14.44	1.24	8.58726	321.64	6.22	23	5.09	0.9948	0.9974	12.15	6.61
14.61	7.17	49.076	146.13	32.95	10	2.83	0.9904	0.9952	5.1	3.85
14.97	8.92	59.5858	312.86	37.72	9	4.49	0.976	0.9879	8.08	6.21
16.04	34.5	215.087	63.85	83.44	6	4.63	0.6772	0.8229	8.75	7.99							DISCARDED (Dip error > 90%)
17.12	11.8	68.9252	241.78	24.82	13	2.98	0.9755	0.9877	9.14	4.6
18.83	8.07	42.8571	147.28	26.51	12	4.39	0.9548	0.9771	10.24	6.31
20.55	11.33	55.1338	259.56	7.8	10	4.55	0.8268	0.9093	11.91	6.68
25.7	13.88	54.0078	316.76	35.42	7	3.82	0.7237	0.8507	8.16	6.43
26.11	17.76	68.0199	306.25	38.65	12	4.33	0.9346	0.9667	10.46	5.89
31.36	14.69	46.8431	92.48	3.67	8	3.52	0.8945	0.9458	7.44	5.62
8.47	Median Dip
12.0794	Average Dip
The shortening might actually be slightly more intense, as we had to assume all fold axes to be upright and not deformed due to the limited resolution of the DTM and the intense degradation of unit Nml.

## Sheet: G48903
Bernhardt, H., and Williams, D.A., 2021, Pityusa Patera, Mars: Structural analyses suggest a mega-caldera above a magma chamber at the crust-mantle interface: Geology, v. 49, https://doi.org/10.1130/G48903.1
